# Supplementary material for: Maximizing the ovarian reserve in mice by evading LINE-1 genotoxicity
Source: PubMed Central journal article supplement (PMC6965193; doi:10.1038/s41467-019-14055-8), 2020-01-16
Supplement: 41467_2019_14055_MOESM2_ESM.pdf [file 41467_2019_14055_MOESM2_ESM.pdf]

## Description of Additional Supplementary Files

File Name: Supplementary Data 1

Description: Quantification and statistical analysis for *Chk2*<sup>+/-</sup> and *Chk2*<sup>-/-</sup> untreated and AZT-treated ovary experiments.

File Name: Supplementary Data 2

Description: Quantification and statistical analysis for meiotic progression in *Chk2*<sup>+/-</sup> and *Chk2*<sup>-/-</sup> oocytes.

File Name: Supplementary Data 3

Description: Differential gene expression and gene ontology for untreated and AZT-treated oocytes and ovaries.

File Name: Supplementary Data 4

Description: Small RNA length distribution and repeat alignment.

File Name: Supplementary Data 5

Description: Quantification and statistical analysis for *Mili;Chk2* untreated and AZT-treated ovary experiments.

File Name: Supplementary Data 6

Description: Differential gene expression in untreated and AZT-treated single-cell clusters.

File Name: Supplementary Data 7

Description: Quantification of follicles and fertility in *Chk2*<sup>+/-</sup> untreated and *Chk2*<sup>-/-</sup> untreated and AZT-treated mice.
